# Supplementary material for: Association of Life's Essential 8 With Cardiovascular Disease and Mortality: The Framingham Heart Study
Source: PubMed Central journal article supplement — J Am Heart Assoc. 2023 Nov 28;12(23):e030764. doi: 10.1161/JAHA.123.030764 (PMC10727315; doi:10.1161/jaha.123.030764), 2023-11-28
Supplement: JAH3-12-e030764-s001.pdf [file JAH3-12-e030764-s001.pdf]

# **Supplemental Material**

**Table S1. Life's Simple 7 Scoring Guidelines.**

| <b>Poor Cardiovascular Health<br/>(0 points)</b>                                             | <b>Intermediate Cardiovascular Health<br/>(1 point)</b>                                                                                             | <b>Ideal Cardiovascular Health<br/>(2 points)</b>                                                                                                 |
|----------------------------------------------------------------------------------------------|-----------------------------------------------------------------------------------------------------------------------------------------------------|---------------------------------------------------------------------------------------------------------------------------------------------------|
| <b>Metric</b> Physical Activity<br><br><b>Definition</b><br>None                             | <b>Metric</b> Physical Activity<br><br><b>Definition</b><br>1-149 min/week moderate intensity exercise or 1-74 min/week vigorous intensity exercise | <b>Metric</b> Physical Activity<br><br><b>Definition</b><br>≥150 min/week moderate intensity exercise or ≥75 min/week vigorous intensity exercise |
| <b>Metric</b> Body Mass Index<br><br><b>Definition</b><br>≥30 kg/m <sup>2</sup>              | <b>Metric</b> Body Mass Index<br><br><b>Definition</b><br>25-29.9 kg/m <sup>2</sup>                                                                 | <b>Metric</b> Body Mass Index<br><br><b>Definition</b><br><25 kg/m <sup>2</sup>                                                                   |
| <b>Metric</b> Blood Pressure<br><br><b>Definition</b><br>SBP ≥140 mm Hg or DBP ≥90 mm Hg     | <b>Metric</b> Blood Pressure<br><br><b>Definition</b><br>SBP 120-139 mm Hg or DBP 80-89 mm Hg or treated to ideal                                   | <b>Metric</b> Blood Pressure<br><br><b>Definition</b><br>SBP <120 mm Hg and DBP <80 mm Hg                                                         |
| <b>Metric</b> Fasting Blood Glucose<br><br><b>Definition</b><br>≥126 mg/dL                   | <b>Metric</b> Fasting Blood Glucose<br><br><b>Definition</b><br>100-125 mg/dL or treated to ideal                                                   | <b>Metric</b> Fasting Blood Glucose<br><br><b>Definition</b><br><100 mg/dL                                                                        |
| <b>Metric</b> Total Cholesterol<br><br><b>Definition</b><br>≥240 mg/dL                       | <b>Metric</b> Total Cholesterol<br><br><b>Definition</b><br>200-239 mg/dL or treated to ideal                                                       | <b>Metric</b> Total Cholesterol<br><br><b>Definition</b><br><200 mg/dL                                                                            |
| <b>Metric</b> Current smoking<br><br><b>Definition</b><br>Current smoker                     | <b>Metric</b> Current smoking<br><br><b>Definition</b><br>Former smoker ≤12 months                                                                  | <b>Metric</b> Current smoking<br><br><b>Definition</b><br>Never or quit >12 months                                                                |
| <b>Metric</b> Healthy Diet Score*<br><br><b>Definition</b><br>0-1 healthy dietary components | <b>Metric</b> Healthy Diet Score*<br><br><b>Definition</b><br>2-3 healthy dietary components                                                        | <b>Metric</b> Healthy Diet Score*<br><br><b>Definition</b><br>4-5 healthy dietary components                                                      |

AHA, American Heart Association; BMI, body mass index; DBP, diastolic blood pressure; HR, heart rate; mg/dL, milligrams per deciliter; min, minutes; mm Hg, millimeters of mercury; SBP, systolic blood pressure. \*Diet scores based on presence of 5 healthy dietary components: ≥4.5 cups fruits or vegetables/day, ≥2 3.5-oz servings of fish/week, ≥3 1-oz servings fiber-rich whole grains/day, <1500 mg sodium/day, ≤450 kcal sugar-sweetened beverages/week.

**Table S2. Life’s Essential 8 Scoring Guidelines at the 2<sup>nd</sup> and 6<sup>th</sup> examination cycles.**

| <b>LE8 Component</b>     | <b>AHA Guidelines</b>                                                                                                                                                                                                                                                                                                                                | <b>Data Discrepancy</b>                                                                                                                                                                                                                                                                                                             | <b>Solution</b>                                                                                                                                                                                                                                                                                                                                                                                                                                                                                                          |
|--------------------------|------------------------------------------------------------------------------------------------------------------------------------------------------------------------------------------------------------------------------------------------------------------------------------------------------------------------------------------------------|-------------------------------------------------------------------------------------------------------------------------------------------------------------------------------------------------------------------------------------------------------------------------------------------------------------------------------------|--------------------------------------------------------------------------------------------------------------------------------------------------------------------------------------------------------------------------------------------------------------------------------------------------------------------------------------------------------------------------------------------------------------------------------------------------------------------------------------------------------------------------|
| <b>Physical Activity</b> | <p><b>Metric</b> Minutes of moderate- (or greater) intensity activity per week</p> <p><b>Scoring</b></p> <p>Points Minutes Classification</p> <p>100 ≥150 Ideal CVH</p> <p>90 120 – 149</p> <p>80 90 – 119</p> <p>60 60 – 89 Intermediate CVH</p> <p>40 30 – 59 Poor CVH</p> <p>20 1 – 29</p> <p>0 0</p>                                             | <p><b>Exam 2</b></p> <p>All participants self-report &gt;150 minutes of moderate/intense exercise per week</p> <p><b>Exam 6</b></p> <p>Exercise is measured in the “number of times engaged in intense physical exercise per week”, “number of flights of stairs climbed per week”, and “number of city blocks walked per week”</p> | <p><b>Exam 2</b></p> <p>Calculate Physical Activity Index based on hours spent sitting, standing, low/moderate/intense exercise</p> <p><b>Exam 6</b></p> <p>Estimate Kcal expenditure per week using the Paffenbarger equation</p> <p><b>Both Exams Scoring</b></p> <p>7<sup>th</sup> septile → 100</p> <p>6<sup>th</sup> septile → 90</p> <p>5<sup>th</sup> septile → 80</p> <p>4<sup>th</sup> septile → 60</p> <p>3<sup>rd</sup> septile → 40</p> <p>2<sup>nd</sup> septile → 20</p> <p>1<sup>st</sup> septile → 0</p> |
| <b>Body Mass Index</b>   | <p><b>Metric</b> BMI (kg/m<sup>2</sup>)</p> <p><b>Scoring</b></p> <p>Points BMI Classification</p> <p>100 &lt;25 Ideal CVH</p> <p>70 25 – 29.9 Intermediate CVH</p> <p>30 30 – 34.9 Poor CVH</p> <p>15 35 – 39.9</p> <p>0 ≥40</p>                                                                                                                    | N/A                                                                                                                                                                                                                                                                                                                                 | Adhered to AHA Guidelines                                                                                                                                                                                                                                                                                                                                                                                                                                                                                                |
| <b>Blood Pressure</b>    | <p><b>Metric</b> Systolic BP / Diastolic BP (mmHg)</p> <p><b>Scoring</b></p> <p>Points Level Classification</p> <p>100 &lt;120/&lt;80 Ideal CVH</p> <p>75 120 – 129/&lt;80 Intermediate CVH</p> <p>50 130 – 139 or 80 – 89</p> <p>25 140 – 159 or 90 – 99 Poor CVH</p> <p>0 ≥160 or ≥100</p> <p>Subtract 20 points for blood pressure medication</p> | N/A                                                                                                                                                                                                                                                                                                                                 | Adhered to AHA Guidelines                                                                                                                                                                                                                                                                                                                                                                                                                                                                                                |
| <b>Glucose/Diabetes</b>  | <p><b>Metric</b> Diabetes Mellitus, Fasting Blood Glucose</p> <p><b>Scoring</b></p> <p>Points Level Classification</p> <p>100 No history of diabetes and FBG &lt;100 (or HbA1c &lt;5.7) Ideal CVH</p> <p>60 No diabetes and FBG Intermediate CVH</p>                                                                                                 | <p><b>Both Exams</b></p> <p>No HbA1c lab data</p>                                                                                                                                                                                                                                                                                   | <p><b>Both Exams</b></p> <p>-Classify 100 and 60 points along AHA guidelines (based on blood glucose)</p> <p>-Participants with diabetes were assigned 30 points</p>                                                                                                                                                                                                                                                                                                                                                     |

|                          |                                                                                                                                                                                                                                                                                                                                                                       |                                                                                                                                                                                                                                                                                                                 |                                                                                                                                                                                                                                                                                         |
|--------------------------|-----------------------------------------------------------------------------------------------------------------------------------------------------------------------------------------------------------------------------------------------------------------------------------------------------------------------------------------------------------------------|-----------------------------------------------------------------------------------------------------------------------------------------------------------------------------------------------------------------------------------------------------------------------------------------------------------------|-----------------------------------------------------------------------------------------------------------------------------------------------------------------------------------------------------------------------------------------------------------------------------------------|
|                          | <p>100–125 (or HbA1c 5.7–6.4)</p> <p>40 Diabetes with HbA1c &lt;7.0 Poor CVH</p> <p>30 Diabetes with HbA1c 7.0–7.9</p> <p>20 Diabetes with HbA1c 8.0–8.9</p> <p>10 Diabetes with Hb A1c 9.0–9.9</p> <p>0 Diabetes with HbA1c ≥10.0</p>                                                                                                                                |                                                                                                                                                                                                                                                                                                                 |                                                                                                                                                                                                                                                                                         |
| <b>Blood Lipids</b>      | <p><b>Metric</b> Non-HDL Cholesterol (mg/dL)</p> <p><b>Scoring</b></p> <p>Points Level Classification</p> <p>100 &lt;130 Ideal CVH</p> <p>60 130 – 159 Intermediate CVH</p> <p>40 160 – 189 Poor CVH</p> <p>20 190 – 219</p> <p>0 ≥220</p> <p>Subtract 20 points for cholesterol medication</p>                                                                       | N/A                                                                                                                                                                                                                                                                                                             | Adhered to AHA Guidelines                                                                                                                                                                                                                                                               |
| <b>Nicotine Exposure</b> | <p><b>Metric</b> Self-reported smoking status</p> <p><b>Scoring</b></p> <p>Points Status Classification</p> <p>100 Never smoker Ideal CVH</p> <p>75 Former smoker, quit ≥5 yr Intermediate CVH</p> <p>50 Former smoker, quit 1 - &lt;5 yr</p> <p>25 Former smoker, quit &lt; 1 yr Poor CVH</p> <p>0 Current smoker</p> <p>Subtract 20 points for secondhand smoke</p> | <p><b>Exam 2</b></p> <p>-“Years since quitting” is a discrete value, so no one can be classified in the 25-point category</p> <p>-No secondhand smoking data for a penalty (exam 2)</p> <p><b>Exam 6</b></p> <p>Missing “Years since quitting smoking” variable, only “current smoking” status at each exam</p> | <p><b>Exam 2</b></p> <p>Updated scoring guidelines:</p> <p>Never smoked → 100</p> <p>≥ 5 years → 75</p> <p>2-4 years → 50</p> <p>1 year → 25</p> <p>Smoker → 0</p> <p><b>Exam 6</b></p> <p>Use previous smoking status, estimate years since quitting, and classify with guidelines</p> |
| <b>Sleep Health</b>      | <p><b>Metric</b> Self-reported average hours of sleep per night</p> <p><b>Scoring</b></p> <p>Points Hours Classification</p> <p>100 7 – 8 Ideal CVH</p> <p>90 9</p> <p>70 6 Intermediate CVH</p> <p>40 5 or ≥10 Poor CVH</p> <p>20 4</p> <p>0 &lt;4</p>                                                                                                               | N/A                                                                                                                                                                                                                                                                                                             | Adhered to AHA Guidelines                                                                                                                                                                                                                                                               |
| <b>Diet</b>              | <p><b>Metric</b> Quantiles of DASH-style diet adherence or HEI-2015 (population)</p> <p><b>Scoring</b></p> <p>Points Level</p> <p>100 ≥95<sup>th</sup> percentile</p> <p>80 75<sup>th</sup> – 94<sup>th</sup> percentile</p> <p>50 50<sup>th</sup> – 74<sup>th</sup> percentile</p>                                                                                   | N/A                                                                                                                                                                                                                                                                                                             | Adhered to AHA Guidelines                                                                                                                                                                                                                                                               |

|  |    |                                                |  |  |
|--|----|------------------------------------------------|--|--|
|  | 25 | 25 <sup>th</sup> – 49 <sup>th</sup> percentile |  |  |
|  | 0  | 1 <sup>st</sup> – 24 <sup>th</sup> percentile  |  |  |

AHA, American Heart Association; BMI, body mass index; BP, blood pressure; CVH, cardiovascular health; DASH, Dietary Approaches to Stop Hypertension; FBG, fasting blood glucose; HbA1c, hemoglobin A1c; HDL, high-density lipoprotein cholesterol; HEI, healthy eating index; HR, heart rate; Kcal, kilocalorie; mmHg, millimeters of mercury; N/A, not available.

**Note:** Non-HDL cholesterol = Total Cholesterol – HDL Cholesterol.

**Table S3. Associations of LS7 and LE8 with risk of CVD and All-Cause Mortality, examination cycle 2 (1979-1982) as baseline.**

|                             | Outcome                  | CVD                    |                |                    | Mortality          |                |                    |
|-----------------------------|--------------------------|------------------------|----------------|--------------------|--------------------|----------------|--------------------|
|                             |                          | No. Events/No. At-risk | 966/2888 (33%) |                    | 1195/2888 (41%)    |                |                    |
| <i>CVH Status Exposures</i> | <i>Model Adjustments</i> | <i>HR (95% CI)</i>     | <i>P Value</i> | <i>C Statistic</i> | <i>HR (95% CI)</i> | <i>P Value</i> | <i>C Statistic</i> |
| LS7 – Ideal                 | Age, Sex                 | 0.29 (0.21, 0.40)      | <0.001         | 0.74               | 0.34 (0.25, 0.45)  | <0.001         | 0.78               |
| LS7 – Intermediate          | Age, Sex                 | 0.52 (0.38, 0.71)      | <0.001         | --                 | 0.53 (0.40, 0.70)  | <0.001         | --                 |
| LE8 – Ideal                 | Age, Sex                 | 0.21 (0.15, 0.28)      | <0.001         | 0.74               | 0.36 (0.28, 0.46)  | <0.001         | 0.78               |
| LE8 – Intermediate          | Age, Sex                 | 0.47 (0.40, 0.56)      | <0.001         | --                 | 0.51 (0.44, 0.60)  | <0.001         | --                 |

LE8 status was defined as ideal if LE8 ≥80, intermediate if LE8 was 50-79, and poor if LE8<50. LS7 status was defined as ideal (10-14), intermediate (5-9), and poor (0-4).

**Note:** Hazard ratios are reported per CVH status, with poor CVH status as referent, C Statistics are Harrell’s Concordance Statistics.

CI, confidence interval; CVD, cardiovascular disease; HR, hazard ratio; LE8, Life’s Essential 8; LS7, Life’s Simple 7; No., Number.

**Table S4. Associations of LS7 and LE8 with risk of CVD and All-Cause Mortality, examination cycle 6 (1995-1998) as baseline.**

|                             | Outcome                  | CVD                |                |                    | Mortality          |                |                    |
|-----------------------------|--------------------------|--------------------|----------------|--------------------|--------------------|----------------|--------------------|
|                             | No. Events/No. At-risk   | 406/1667 (24%)     |                |                    | 485/1667 (29%)     |                |                    |
| <i>CVH Status Exposures</i> | <i>Model Adjustments</i> | <i>HR (95% CI)</i> | <i>P Value</i> | <i>C Statistic</i> | <i>HR (95% CI)</i> | <i>P Value</i> | <i>C Statistic</i> |
| LS7 – Ideal                 | Age, Sex                 | 0.51 (0.33, 0.78)  | 0.002          | 0.70               | 0.64 (0.44, 0.93)  | 0.02           | 0.77               |
| LS7 – Intermediate          | Age, Sex                 | 0.77 (0.42, 1.13)  | 0.18           | --                 | 0.71 (0.51, 1.01)  | 0.05           | --                 |
| LE8 – Ideal                 | Age, Sex                 | 0.35 (0.23, 0.52)  | <0.001         | 0.71               | 0.47 (0.33, 0.67)  | <0.001         | 0.77               |
| LE8 – Intermediate          | Age, Sex                 | 0.56 (0.43, 0.71)  | <0.001         | --                 | 0.60 (0.48, 0.75)  | <0.001         | --                 |

LE8 status was defined as ideal if LE8 ≥80, intermediate if LE8 was 50-79, and poor if LE8<50. LS7 status was defined as ideal (10-14), intermediate (5-9), and poor (0-4).

**Note:** Hazard ratios are reported per CVH status, with poor CVH status as referent, C Statistics are Harrell's Concordance Statistics.

CI, confidence interval; CVD, cardiovascular disease; HR, hazard ratio; LE8, Life's Essential 8; LS7, Life's Simple 7; No., Number.

**Table S5. Associations of LS7 and LE8 with risk of CVD and All-Cause Mortality, examination cycle 6 (1995-1998) as baseline, adjusted for change in CVH scores from Exam 2 to Exam 6.**

|                             | <b>Outcome</b>           | <b>CVD</b>         |                |                    | <b>Mortality</b>   |                |                    |
|-----------------------------|--------------------------|--------------------|----------------|--------------------|--------------------|----------------|--------------------|
|                             | No. Events/No. At-risk   | 311/1211 (26%)     |                |                    | 364/1211 (30%)     |                |                    |
| <i>Continuous Variables</i> | <i>Model Adjustments</i> | <i>HR (95% CI)</i> | <i>P Value</i> | <i>C Statistic</i> | <i>HR (95% CI)</i> | <i>P Value</i> | <i>C Statistic</i> |
| Life's Simple 7             | Age, Sex, Change in LS7  | 0.66 (0.57, 0.76)  | <0.001         | 0.71               | 0.75 (0.66, 0.86)  | <0.001         | 0.78               |
| Life's Essential 8          | Age, Sex, Change in LE8  | 0.61 (0.53, 0.70)  | <0.001         | 0.72               | 0.76 (0.67, 0.86)  | <0.001         | 0.78               |

\* Models run on continuous CVH scores, adjusting for change in CVH from exam 2 to exam 6 (N = 1211 participants with CVH scores at both exam cycles)

**Note:** Hazard ratios are reported per 1-standard deviation increase in continuous LS7 and LE8 score, C Statistics are Harrell's Concordance Statistics.

C, concordance; CI, confidence interval; CVD, cardiovascular disease; HR, hazard ratio; LE8, Life's Essential 8; LS7, Life's Simple 7; No., Number.



**Figure S1. Kaplan Meier Plots for CVD and Death at Exams 2 and 6.**

**A.** Kaplan Meier Plots for LE8 and Death at Exams 2

**B.** Kaplan Meier Plots for LE8 and CVD at Exams 2

**C.** Kaplan Meier Plots for LE8 and Death at Exams 6

**D.** Kaplan Meier Plots for LE8 and CVD at Exams 6

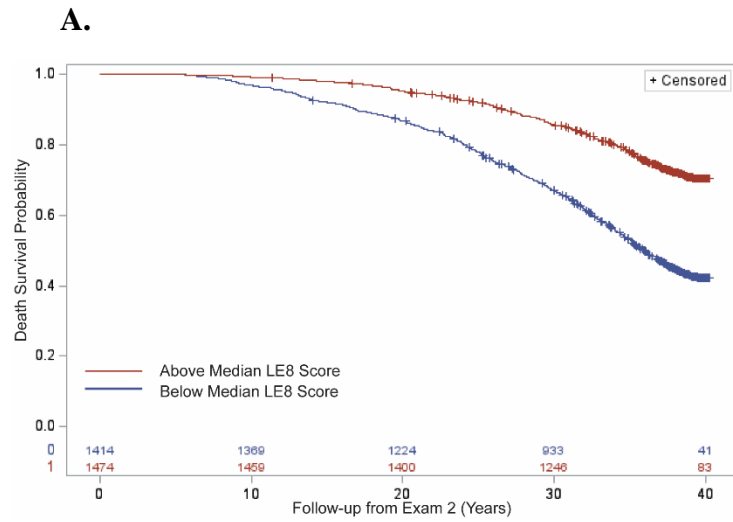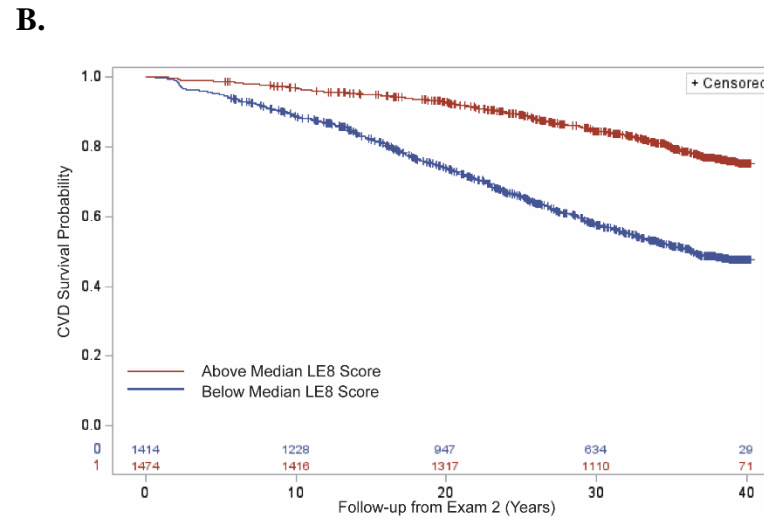

**C.**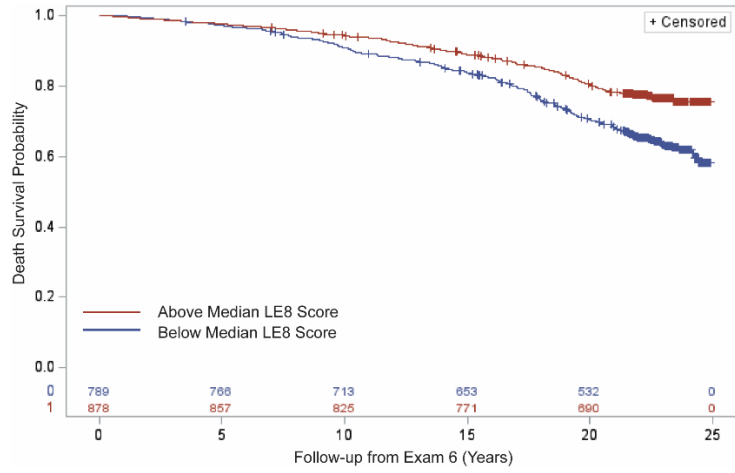**D.**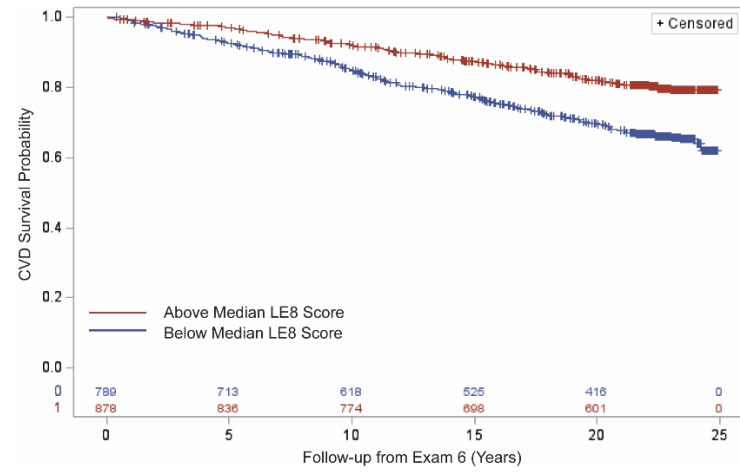

CVD, cardiovascular disease; LE8, Life's Essential 8.
